## CORRECTION

# Insulin signaling promotes germline proliferation in *C. elegans*

David Michaelson, Dorota Z. Korta, Yossi Capua and E. Jane Albert Hubbard

There were errors published in *Development* **137**, 671-680.

We recently discovered that the genotypes of several strains that we reported as *daf-16(mu86)* actually carry the *daf-16(m26)* allele. Correct genotypes for strains listed in Tables S1 and S3 and those used in experiments reported in Fig. 3C and Fig. S2C and related text and legends are:

DR1309: *daf-16(m26); daf-2(e1370)*

GC967: *daf-16(m26); glp-1(ar202); naEx148 [pGP30(DAF-16::GFP) + sur-5::GFP]*

GC1109: *daf-16(m26); daf-2(e1370); naEx202[pGC461 (Plag-2::daf-16::GFP) + pRF4]*

GC1112: *daf-16(m26); daf-2(e1370); naEx148[pGP30 (daf-16::GFP) + sur-5::GFP]*

GC1144: *daf-16(m26); daf-2(e1370); naIs43[pGC492(Prpl-11.1::daf-16cDNA::GFP::nos2 3'UTR unc-119(+))]*. Note that the legend to Table S1 indicates that expression of the *daf-16::GFP* transgene in GC1144 was silenced subsequent to data collection.

The conclusions of the paper are not altered by these errors. The authors apologise to readers for these mistakes.
